# Supplementary material for: Layered CoS@NC in situ loaded onto Ti3C2Tx MXene as an efficient lithium-ion battery anode
Source: Royal Society of Chemistry journal article supplement (doi:10.1039/d3dt04005d), 2024-01-01
Supplement: d3dt04005d1.pdf [file d3dt04005d1.pdf]

## Layered CoS@NC in-situ loaded onto $Ti_3C_2Tx$ MXene as efficient lithium-ion battery anode

Lei Zhang<sup>1</sup>, Hankun Tan<sup>1</sup>, Haoxian Zhu, Kun Yang, Wei Li, Li Sun\*

Engineering Research Center of Ministry of Education for Geological Carbon Storage and Low Carbon Utilization of Resources, Beijing Key Laboratory of Materials Utilization of Nonmetallic Minerals and Solid Wastes, National Laboratory of Mineral Materials, School of Materials Science and Technology, China University of Geosciences, Beijing 100083, China

E-mail address: sunli@cugb.edu.cn

<sup>1</sup> These authors contributed equally to this work.

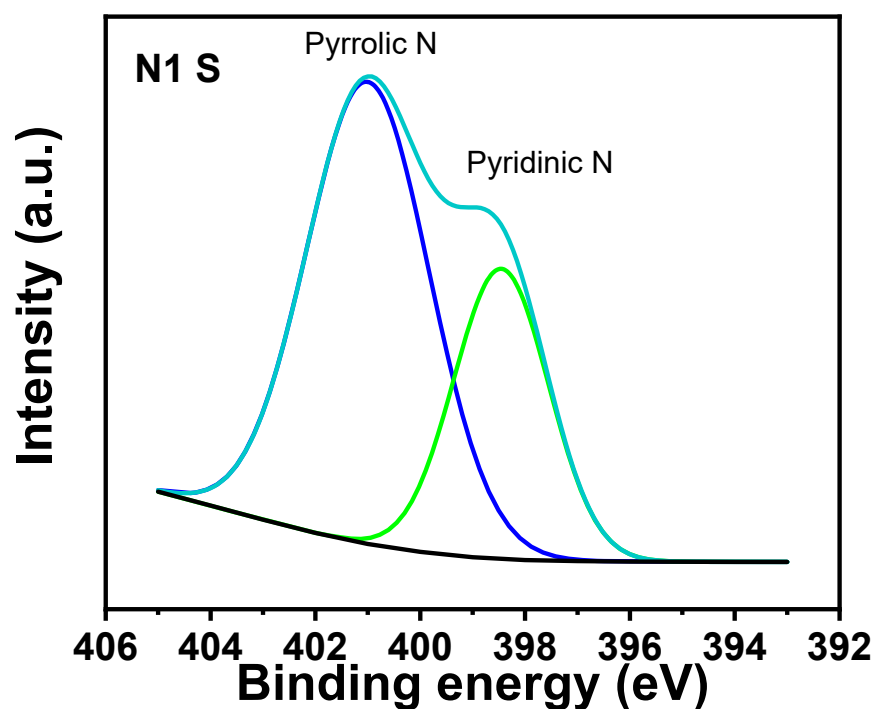

Fig. S1 XPS spectrum of N1s in CoS@NC/MXene.

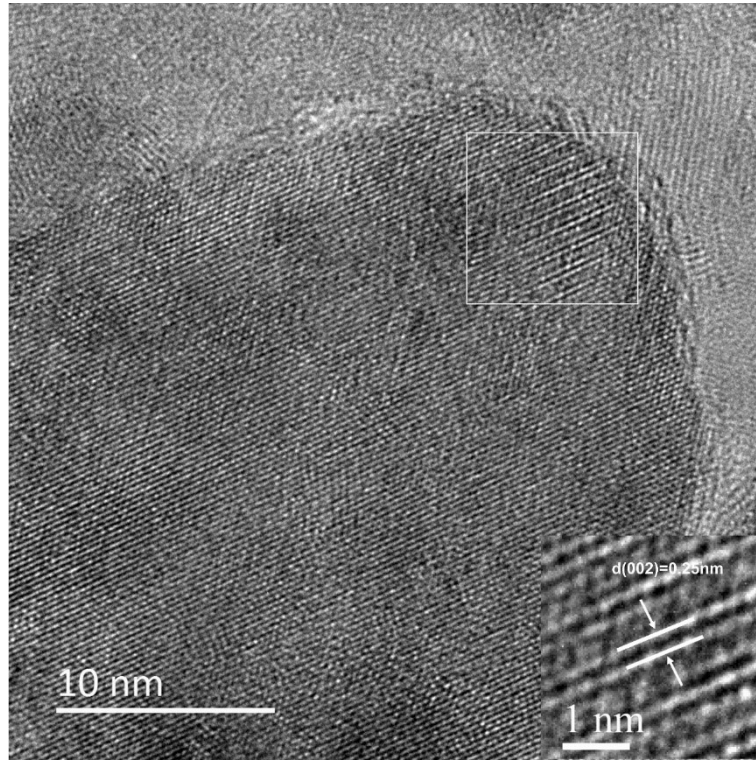

**Fig. S2** HRTEM image of CoS@NC/MXene.
